# Supplementary material for: In Vitro and In Vivo Inhibitory Effect of Gujin Xiaoliu Tang in Non‐Small Cell Lung Cancer
Source: Hindawi journal article supplement (doi:10.1155/2018/8936108), 2018-01-01
Supplement: f1 [file 8936108.f1.pdf]

**The OD value of different concentrations of GJXTL against A549 cells at different time point**

**(1)12h:**

568.00ug/ml:0.3790,0.2289,0.3042,0.3288,0.0674,0.2201  
 284.00ug/ml:0.2762,0.2324,0.4608,0.2589,0.2593,0.3209  
 142.00ug/ml:0.3123,0.3206,0.2267,0.2890,0.3796,0.3392  
 71.00ug/ml:0.4930,0.3415,0.4555,0.5022,0.4554,0.5655  
 35.50ug/ml:0.4815,0.5079, 0.9200,0.5413,0.4834,0.6310  
 17.55ug/ml:0.6349,0.5677,0.5458,0.7293,0.7322,0.6952  
 8.88ug/ml:0.5447,0.7959,0.9297,1.0672,0.9782,0.6132  
 0.00ug/ml:0.8579,0.8445, 0.8377,0.5216,1.2558,0.7909

**(1)24h:**

568.00ug/ml: 0.3247,0.3783,0.3787,0.3776,0.3137,0.4090  
 284.00ug/ml: 0.4623,0.4601,0.4532,0.4472,0.4727,0.4762  
 142.00ug/ml: 0.4396,0.4662,0.6419,0.7133,0.7463,0.3958  
 71.00ug/ml: 0.5585,0.6043,0.4870,0.4241,0.7089,1.4660  
 35.50ug/ml: 0.7289,0.7879,0.6785,0.4888,0.5845,0.7272  
 17.55ug/ml: 0.8376,0.8763,0.5340,0.8825,0.8783,0.9906  
 8.88ug/ml:0.6554,0.9758,0.8982,0.8356,1.3987,1.0045  
 0.00ug/ml: 0.9782,1.1131,0.6869,0.8288,1.2622,1.2583

**(1)36h:**

568.00ug/ml: 0.4119,0.4286,0.0704,0.2979,0.5447,0.3828  
 284.00ug/ml: 0.4257,0.3087,0.5311,0.3245,0.4239,0.3604  
 142.00ug/ml: 0.4517,0.4079,0.4678,0.4011,0.3003,0.5724  
 71.00ug/ml: 0.4506,0.7691,0.5601,0.5828,0.5789,0.6714  
 35.50ug/ml: 0.5745,0.8494,0.7979,0.7243,0.5531,0.5665  
 17.55ug/ml: 0.7819,0.9067,0.8211,0.5360,1.2877,0.5924  
 8.88ug/ml: 0.6934,0.8828,1.374,0.7188,0.8928,0.8747  
 0.00ug/ml: 1.796,1.3648,1.3876,1.6806,1.4187,1.0223

**Apoptotic rate of A549 cells treated with different concentrations of GJXTL for 24h**

| GJXTL (ug/mL) | Viable cells (%) | Early apoptotic cells (%) | Advanced apoptotic cells (%) |
|---------------|------------------|---------------------------|------------------------------|
| 0.00          | 94.18            | 0.41                      | 1.82                         |
|               | 95.78            | 0.25                      | 1.95                         |
|               | 97.44            | 0.57                      | 1.81                         |
|               | 87.80            | 1.31                      | 3.65                         |
| 142.00        | 85.59            | 1.50                      | 4.49                         |
|               | 77.38            | 1.52                      | 5.78                         |

|        |       |      |       |
|--------|-------|------|-------|
|        | 90.02 | 1.81 | 5.85  |
| 284.00 | 78.05 | 2.76 | 8.99  |
|        | 72.08 | 3.14 | 9.09  |
|        | 69.31 | 4.01 | 14.39 |
| 568.00 | 72.86 | 5.48 | 12.06 |
|        | 72.41 | 6.35 | 10.33 |

**Effects of different concentrations GJXTL on grey level of STAT3,p-STAT3 and VEGF protein activity in JAK2/STAT3 signal pathway**

| GJXTL (ug/mL) | $\beta$ -actin | STAT3  | P-STAT3 | VEGF    |
|---------------|----------------|--------|---------|---------|
|               | 9.2221         | 9.2668 | 7.5701  | 11.6636 |
| 0.00          | 8.5635         | 9.1232 | 6.3524  | 10.2356 |
|               | 9.9845         | 8.5621 | 5.0526  | 9.9856  |
|               | 9.8248         | 8.9981 | 6.0411  | 9.1561  |
| 142.00        | 10.2352        | 8.2546 | 6.2531  | 8.2456  |
|               | 9.4563         | 9.0213 | 5.0213  | 8.5624  |
|               | 10.7833        | 8.2099 | 7.1135  | 8.8865  |
| 284.00        | 10.0833        | 8.7565 | 4.8963  | 7.8546  |
|               | 9.1203         | 8.6542 | 5.2132  | 7.0546  |
|               | 8.7233         | 9.3377 | 4.0306  | 6.0324  |
| 568.00        | 8.6532         | 9.0213 | 4.0213  | 5.5632  |
|               | 8.9532         | 8.5986 | 3.8546  | 5.4635  |

**Effects of different concentrations GJXTL on grey level of STAT3,p-STAT3 and VEGF protein activity in JAK2/STAT3 signal pathway**

| GJXTL (ug/mL) | STAT3  | p-STAT3 | VEGF    | $\beta$ -actin |
|---------------|--------|---------|---------|----------------|
|               | 9.2668 | 7.5701  | 11.6636 | 9.2221         |
| 0.00          | 9.1232 | 6.3524  | 10.2356 | 8.5635         |
|               | 8.5621 | 5.0526  | 9.9856  | 9.9845         |

|        |        |        |        |         |
|--------|--------|--------|--------|---------|
|        | 8.9981 | 6.0411 | 9.1561 | 9.8248  |
| 142.00 | 8.2546 | 6.2531 | 8.2456 | 10.2352 |
|        | 9.0213 | 5.0213 | 8.5624 | 9.4563  |
|        | 8.2099 | 7.1135 | 8.8865 | 10.7833 |
| 284.00 | 8.7565 | 4.8963 | 7.8546 | 10.0833 |
|        | 8.6542 | 5.2132 | 7.0546 | 9.1203  |
|        | 9.3377 | 4.0306 | 6.0324 | 8.7233  |
| 568.00 | 9.0213 | 4.0213 | 5.5632 | 8.6532  |
|        | 8.5986 | 3.8546 | 5.4635 | 8.9532  |

**Effects of different concentrations GJXTL on relative grey level of STAT3,p-STAT3 and VEGF protein activity in JAK2/STAT3 signal pathway**

| GJXTL (ug/mL) | STAT3  | P-STAT3 | VEGF   |
|---------------|--------|---------|--------|
|               | 1.0048 | 0.8209  | 1.2647 |
| 0.00          | 1.0654 | 0.7418  | 1.1953 |
|               | 0.8575 | 0.6109  | 1.0001 |
|               | 0.9159 | 0.6149  | 0.8241 |
| 142.00        | 0.8065 | 0.4856  | 0.8056 |
|               | 0.9540 | 0.5310  | 0.9055 |
|               | 0.7614 | 0.6597  | 0.8247 |
| 284.00        | 0.8684 | 0.4856  | 0.7790 |
|               | 0.7782 | 0.4688  | 0.7735 |
|               | 1.0704 | 0.4620  | 0.6915 |
| 568.00        | 1.0425 | 0.4647  | 0.6429 |
|               | 0.9604 | 0.4305  | 0.6102 |

**The tumor volume of different concentrations of GJXTL against A549 cells at different time point (mm<sup>3</sup>)**

| Group   | n | D1    | D5     | D9     | D13    | D17    | D21    |
|---------|---|-------|--------|--------|--------|--------|--------|
| Control | 7 | 115.2 | 123.72 | 152.21 | 204.86 | 319.23 | 474.51 |
|         |   | 82.56 | 87.35  | 100.55 | 228.30 | 282.08 | 275.85 |
|         |   | 89.04 | 135.23 | 189.87 | 497.62 | 609.13 | 760.64 |

|              |   |        |        |        |        |        |        |
|--------------|---|--------|--------|--------|--------|--------|--------|
|              |   | 59.20  | 95.86  | 134.56 | 248.84 | 340.07 | 411.60 |
|              |   | 67.2   | 82.56  | 91.50  | 243.68 | 490.92 | 786.16 |
|              |   | 114.22 | 118.01 | 121.50 | 369.98 | 590.86 | 821.74 |
|              |   | 96.00  | 120.35 | 151.29 | 175.50 | 301.94 | 368.37 |
|              | 9 | 66.26  | 70.56  | 110.86 | 137.46 | 152.89 | 188.32 |
|              |   | 99.45  | 130.25 | 180.59 | 192.12 | 254.78 | 297.44 |
|              |   | 78.03  | 82.31  | 96.75  | 124.00 | 172.34 | 202.68 |
|              |   | 59.39  | 75.42  | 119.48 | 188.75 | 214.93 | 201.11 |
| DDP          |   | 167.27 | 170.25 | 187.55 | 445.18 | 521.46 | 757.73 |
|              |   | 93.15  | 115.32 | 151.42 | 220.47 | 290.83 | 359.74 |
|              |   | 129.71 | 145.31 | 185.00 | 323.64 | 390.21 | 419.90 |
|              |   | 121.50 | 122.45 | 132.06 | 253.67 | 321.86 | 390.04 |
|              |   | 129.65 | 132.38 | 137.5  | 151.23 | 199.25 | 208.5  |
|              | 7 | 107.8  | 100.2  | 105.84 | 190.68 | 221.81 | 272.92 |
|              |   | 81.56  | 78.52  | 98.88  | 141.66 | 220.17 | 292.67 |
|              |   | 71.35  | 62.31  | 75.29  | 98.21  | 102.35 | 119.48 |
| GJXLT-low    |   | 90.50  | 110.23 | 148.72 | 330.43 | 512.21 | 871.79 |
|              |   | 54.78  | 78.93  | 118.19 | 131.07 | 180.23 | 178.93 |
|              |   | 115.2  | 121.30 | 127.5  | 309.66 | 445.53 | 753.59 |
|              |   | 73.41  | 110.25 | 177.5  | 424.34 | 475.56 | 627.20 |
|              | 8 | 84.53  | 108.96 | 175.11 | 184.88 | 285.35 | 350.75 |
|              |   | 56.59  | 105.63 | 126.67 | 140.56 | 205.46 | 270.36 |
|              |   | 68.69  | 72.56  | 128.22 | 130.79 | 195.89 | 260.99 |
|              |   | 10.00  | 15.23  | 21.87  | 51.84  | 96.86  | 101.88 |
| GJXLT-middle |   | 130.00 | 132.14 | 224.49 | 307.00 | 386.85 | 380.7  |
|              |   | 135.87 | 185.2  | 257.55 | 335.92 | 390.65 | 465.79 |
|              |   | 116.31 | 131.23 | 210    | 229.9  | 262.82 | 335.73 |
|              |   | 27     | 31.20  | 80.62  | 97.49  | 115.68 | 193.87 |
|              |   |        |        |        |        | 407.93 |        |
|              |   | 94.19  | 156.25 | 244.80 | 346.8  | 62.84  | 509.06 |
|              |   | 21.87  | 28.56  | 40.5   | 49.01  | 227.49 | 76.67  |
|              |   | 110.26 | 134.65 | 167.50 | 211.14 | 285.54 | 247.84 |
|              |   | 119.48 | 135.65 | 177.5  | 240.66 | 300.08 | 314.47 |
| GJXLT-high   | 8 | 110.48 | 132.85 | 172.5  | 268.04 | 280.56 | 312.11 |
|              |   | 92.60  | 100.31 | 105.3  | 195.96 | 259.12 | 301.18 |
|              |   | 149.76 | 156.23 | 182.07 | 187.27 | 103.02 | 282.96 |
|              |   | 18.75  | 26.53  | 36.9   | 97.2   |        | 110.59 |

#### The stripped tumor volume of different concentrations of GJXTL against A549 cells (mm<sup>3</sup>)

| Group     | The stripped tumor volume |
|-----------|---------------------------|
|           | 204.12                    |
|           | 867.70                    |
|           | 176.72                    |
| Control   | 732.64                    |
|           | 278.3                     |
|           | 309.35                    |
|           | 663.26                    |
|           | 366.77                    |
|           | 173.60                    |
|           | 273.10                    |
|           | 287.18                    |
| DDP       | 179.40                    |
|           | 236.88                    |
|           | 352.11                    |
|           | 296.45                    |
|           | 601.04                    |
|           | 409.73                    |
|           | 172.87                    |
| GJXLT-low | 106.60                    |
|           | 818.50                    |
|           | 848.38                    |

|              |        |
|--------------|--------|
| GJXLT-middle | 244.95 |
|              | 126.96 |
|              | 450.17 |
|              | 323.54 |
|              | 245.24 |
|              | 365.92 |
|              | 253.28 |
|              | 146.45 |
|              | 77.63  |
|              | 158.02 |
| GJXLT-high   | 272.41 |
|              | 206.23 |
|              | 272.82 |
|              | 67.74  |
|              | 406.08 |
|              | 283.17 |
|              | 96.66  |
|              | 140.05 |

#### The positive expression rates of Ki-67 (%)

| Control | DDP   | GJXLT-low | GJXLT-middle | GJXLT-high |
|---------|-------|-----------|--------------|------------|
| 72.35   | 63.52 | 56.58     | 58.96        | 35.56      |
| 68.45   | 68.72 | 53.26     | 45.23        | 30.24      |
| 70.68   | 75.56 | 65.23     | 38.98        | 28.89      |
| 69.52   | 65.35 | 45.69     | 40.23        | 26.53      |
| 50.25   | 53.26 | 62.35     | 39.65        | 28.51      |

#### Body weight increase in A549 xenograft mice

| Group        | n | The body weight before the experiment(g) | The body weight after the experiment(g) | The body weight increase in A549 xenograft mice (%) |
|--------------|---|------------------------------------------|-----------------------------------------|-----------------------------------------------------|
| Control      | 7 | 19.5                                     | 21.5                                    | 10.25                                               |
|              |   | 17.2                                     | 18.1                                    | 5.23                                                |
|              |   | 18.6                                     | 21.7                                    | 16.67                                               |
|              |   | 21.4                                     | 22.4                                    | 4.67                                                |
|              |   | 14.0                                     | 16.4                                    | 17.14                                               |
|              |   | 15.7                                     | 15.2                                    | 3.28                                                |
|              |   | 15.4                                     | 17.9                                    | 16.23                                               |
| DDP          | 9 | 17.6                                     | 15.4                                    | -12.5                                               |
|              |   | 18.7                                     | 15.5                                    | -17.11                                              |
|              |   | 18.1                                     | 15.3                                    | -15.47                                              |
|              |   | 14.4                                     | 13.4                                    | -6.94                                               |
|              |   | 15.2                                     | 11.5                                    | -24.34                                              |
|              |   | 13.5                                     | 12.1                                    | -10.37                                              |
|              |   | 18.6                                     | 14.2                                    | -23.65                                              |
|              |   | 14.0                                     | 10.1                                    | -27.85                                              |
| GJXLT-low    | 7 | 15.9                                     | 11.3                                    | -28.93                                              |
|              |   | 17.8                                     | 20.2                                    | 13.48                                               |
|              |   | 18.5                                     | 20.6                                    | 10.19                                               |
|              |   | 11.3                                     | 16.1                                    | 42.48                                               |
|              |   | 16.3                                     | 19.0                                    | 14.21                                               |
|              |   | 14.8                                     | 15.8                                    | 6.76                                                |
|              |   | 15.6                                     | 17.4                                    | 11.54                                               |
| GJXLT-middle | 8 | 15.0                                     | 17.8                                    | 18.67                                               |
|              |   | 18.8                                     | 21.5                                    | 14.36                                               |
|              |   | 19.4                                     | 21.0                                    | 8.25                                                |
|              |   | 15.6                                     | 20.0                                    | 28.21                                               |
|              |   | 18.1                                     | 22.1                                    | 22.10                                               |

|            |   |      |      |       |
|------------|---|------|------|-------|
| GJXLT-high | 8 | 16.4 | 17.6 | 7.31  |
|            |   | 14.5 | 17.3 | 8.23  |
|            |   | 18.1 | 19.0 | 4.97  |
|            |   | 20.8 | 22.0 | 5.77  |
|            |   | 18.8 | 21.5 | 14.36 |
|            |   | 19.4 | 21.0 | 8.25  |
|            |   | 15.6 | 20   | 28.20 |
|            |   | 18.1 | 22.1 | 22.10 |
|            |   | 16.4 | 22.2 | 35.37 |
|            |   | 14.5 | 17.6 | 21.38 |
|            |   | 15.7 | 17.3 | 10.19 |
|            |   | 20.8 | 19.0 |       |
|            |   |      |      |       |
